# Supplementary material
Source: publisher figshare collection journal article supplement (https://springernature.figshare.com/articles/dataset/_/9723218)
Supplement: Supplementary file [file 17414342]

Supplementary material Figure 1.  
Prevalence of comorbidities by age group

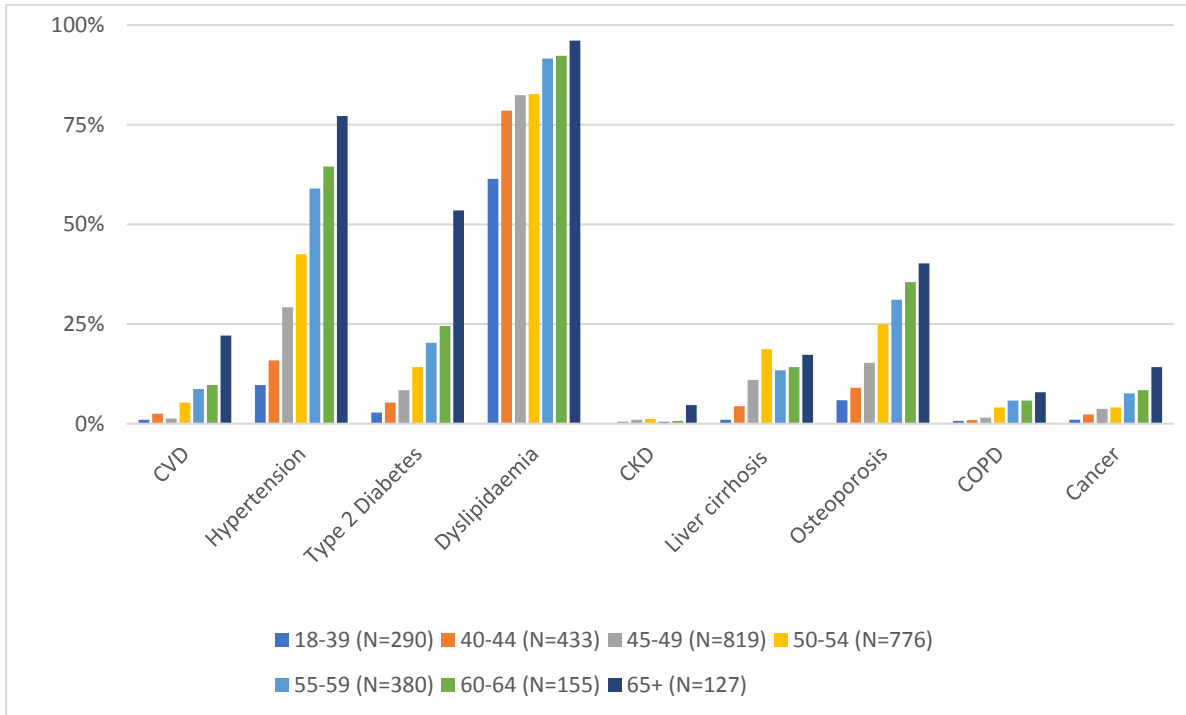

1 Supplementary Table 1.

2 Health variables included in the frailty indices and description of deficit scoring

3

| No.                          | Variable                          | Deficit description                                                                                               |
|------------------------------|-----------------------------------|-------------------------------------------------------------------------------------------------------------------|
| <b>37-item frailty index</b> |                                   |                                                                                                                   |
| 1                            | Lipoatrophy                       | • Multicenter AIDS Cohort Study (MACS) criteria (50)                                                              |
| 2                            | Lipohypertrophy                   | • MACS criteria (43)                                                                                              |
| 3                            | Non-alcoholic fatty liver disease | • Liver/spleen ratio < 1.1                                                                                        |
| 4                            | Menopause or male hypogonadism    | • If female: FSH>30 IU/L & LH<30 IU/L and/or absence of menstruation >1 year<br>• If male: testosterone<300 ng/dL |
| 5                            | High or low body mass index       | • <18 or >25 kg/m <sup>2</sup>                                                                                    |
| 6                            | High waist circumference          | • If female: >88 cm<br>• If male: >102 cm                                                                         |
| 7                            | High visceral adipose tissue      | • VAT>130 cm <sup>2</sup> or VAT/TAT ratio >0.5                                                                   |
| 8                            | Sarcopenia or presarcopenia       | • Fat-free mass index < -1 SD                                                                                     |
| 9                            | Insulin resistance                | • Homeostasis Model Assessment – Insulin Resistance (HOMA-IR) (51) > 2.8                                          |
| 10                           | High total cholesterol            | • > 200 mg/dL                                                                                                     |
| 11                           | High low density lipoprotein      | • >100 mg/dL                                                                                                      |
| 12                           | Low high density lipoprotein      | • < 40 mg/dL                                                                                                      |
| 13                           | High triglycerides                | • >150 mg/dL                                                                                                      |
| 14                           | High homocysteine                 | • If female, > 10 μmol/L<br>• If male, > 15 μmol/L                                                                |
| 15                           | Abnormal white blood cell counts  | • < 4000 cells/μL                                                                                                 |
| 16                           | Anemia                            | • If female, < 10 grams/dL<br>• If male, < 12 grams/dL.                                                           |
| 17                           | Hepatitis C co-infection          | • Positive                                                                                                        |
| 18                           | Hepatitis B co-infection          | • Hepatitis B Antigen positive                                                                                    |

|    |                                                |                                                                           |
|----|------------------------------------------------|---------------------------------------------------------------------------|
| 19 | Vitamin D insufficiency                        | • < 30 ng/mL                                                              |
| 20 | Polypharmacy                                   | • > 5 drug classes (excluding antiretroviral therapy)                     |
| 21 | Abnormal parathyroid hormone                   | • > 60 pg/mL                                                              |
| 22 | Elevated D-dimer                               | • > sample mean (358)                                                     |
| 23 | Elevated C-reactive protein                    | • > 0.7 mg/L                                                              |
| 24 | Sedentary lifestyle                            | • < 3 hours/week physical activity                                        |
| 25 | Atherosclerosis                                | • Coronary artery calcium score > 100 or intima media thickness > 0.85 mm |
| 26 | Hyponatremia                                   | • < 125 mmol/L                                                            |
| 27 | Proteinuria or albuminuria                     | • > 5 mg/mmol                                                             |
| 28 | Elevated aspartate transaminase (AST)          | • > 31 U/L                                                                |
| 29 | Elevated alanine transaminase (ALT)            | • > 31 U/L                                                                |
| 30 | Abnormal alkaline phosphatase                  | • < 38 or > 126 U/L                                                       |
| 31 | Elevated gamma-glutamyl transphosphatase (GGT) | • > 55 U/L                                                                |
| 32 | Low platelets                                  | • < 150 billion/L                                                         |
| 33 | Abnormal potassium                             | • < 3.5 or > 5.3 mEq/L                                                    |
| 34 | Abnormal phosphorus                            | • < 2.5 or > 5.1 mg/dL                                                    |
| 35 | Abnormal thyroid stimulating hormone           | • < 0.27 or > 4.2 mIU/L                                                   |
| 36 | Elevated total bilirubin                       | • > 1.10 mg/dL                                                            |
| 37 | Unemployment                                   | • Self-report                                                             |

4  
5  
6  
7  
8  
9  
10  
11  
12

13

14
